ActivePathways: Paczkowska, Barenboim, *et al.*

# 1 Integrative pathway enrichment analysis of multivariate omics data

2

3 Marta Paczkowska<sup>1,\*</sup>, Jonathan Barenboim<sup>1,\*</sup>, Nardnisa Sintupisut<sup>1</sup>, Natalie C. Fox<sup>1,2</sup>, Helen  
4 Zhu<sup>1,2</sup>, Diala Abd-Rabbo<sup>1</sup>, PCAWG Network and Pathway Analysis Group, Paul C. Boutros<sup>1,2,3</sup>,  
5 Jüri Reimand<sup>1,2,@</sup>

6

7 1 - Ontario Institute for Cancer Research, Toronto, Ontario, Canada

8 2 - Department of Medical Biophysics, University of Toronto, Toronto, Ontario, Canada

9 3 - Department of Pharmacology & Toxicology, University of Toronto, Toronto, Ontario, Canada

10 \* - these authors contributed equally

11 @ - correspondence: [Juri.Reimand@utoronto.ca](mailto:Juri.Reimand@utoronto.ca)

12

## 13 ABSTRACT

14 **Multi-omics datasets quantify complementary aspects of molecular biology and thus pose**  
15 **challenges to data interpretation and hypothesis generation. ActivePathways is an**  
16 **integrative method that discovers significantly enriched pathways across multiple omics**  
17 **datasets using a statistical data fusion approach, rationalizes contributing evidence and**  
18 **highlights associated genes. We demonstrate its utility by analyzing coding and non-**  
19 **coding mutations from 2,583 whole cancer genomes, revealing frequently mutated**  
20 **hallmark pathways and a long tail of known and putative cancer driver genes. We also**  
21 **studied prognostic molecular pathways in breast cancer subtypes by integrating genomic**  
22 **and transcriptomic features of tumors and tumor-adjacent cells and found significant**  
23 **associations with immune response processes and anti-apoptotic signaling pathways.**  
24 **ActivePathways is a versatile method that improves systems-level understanding of**  
25 **cellular organization in health and disease through integration of multiple molecular**  
26 **datasets and pathway annotations.**

ActivePathways: Paczkowska, Barenboim, *et al.*

## 27 Introduction

28 Pathway enrichment analysis is an essential step for interpreting high-throughput (*omics*) data  
29 that uses current knowledge of genes and biological processes. A common application  
30 determines statistical enrichment of molecular pathways, biological processes and other  
31 functional annotations in long lists of candidate genes<sup>1,2</sup>. Genomic, transcriptomic, proteomic and  
32 epigenomic experiments emphasize distinct and complementary aspects of underlying biology  
33 and are best analyzed integratively, as is now routinely done in large-scale projects such as The  
34 Cancer Genome Atlas (TCGA)<sup>3</sup>, Clinical Proteome Tumor Analysis Consortium (CPTAC),  
35 International Cancer Genome Consortium (ICGC)<sup>4</sup>, Genotype-Tissue Expression (GTEx)<sup>5</sup> and  
36 others. Thus, simultaneous analysis of multiple candidate gene lists for characteristic pathways  
37 is increasingly needed. Numerous approaches are available for interpreting single gene lists. For  
38 example, the GSEA algorithm can detect up- and down-regulated pathways in gene expression  
39 datasets<sup>6</sup>. Web-based methods such as Panther<sup>7</sup>, ToppCluster<sup>8</sup> and g:Profiler<sup>9</sup> detect significantly  
40 enriched pathways amongst ranked or unranked gene lists and are generally applicable to genes  
41 and proteins from various analyses. Some approaches allow analysis of multiple input gene lists  
42 however these primarily rely on visualization rather than data integration to evaluate the  
43 contribution of distinct gene lists towards each detected pathway<sup>8,9</sup>. Finally, no methods are  
44 available for unified pathway analysis of coding and non-coding mutations from whole-genome  
45 sequencing (WGS) data, or integrating these with other types of DNA aberrations such as copy  
46 number changes and balanced genomic rearrangements. We report the development of the  
47 ActivePathways method that uses data fusion techniques to address the challenge of integrative  
48 pathway analysis of multi-omics data. We demonstrate the method by analyzing known and  
49 candidate cancer driver genes with coding and non-coding somatic mutations in 2,583 whole  
50 cancer genomes of the ICGC-TCGA PCAWG project<sup>10,11</sup>, prognostic pathways in breast cancer  
51 subtypes, and regulatory networks of tissue transcriptomes using the GTEx<sup>5</sup> compendium.

52 Characterization of genes and somatic mutations that drive oncogenesis is a central goal of  
53 cancer genomics research. Cancer genomes are characterized by few frequently mutated pan-  
54 cancer drivers such as *TP53*, less-frequent drivers with primarily tissue-specific effects and  
55 numerous infrequently mutated genes often referred to as *the long tail*. The majority of currently  
56 known driver mutations affect protein-coding sequence<sup>12</sup> and only few high-confidence non-  
57 coding drivers have been found, such as the mutation hotspots in the *TERT* promoter<sup>13</sup>. Discovery  
58 of non-coding driver mutations is a major goal of large cancer whole genome sequencing efforts  
59 such as PCAWG<sup>10,11</sup>. Pathway and network analysis of cancer mutations is a powerful approach

ActivePathways: Paczkowska, Barenboim, *et al.*

60 that uses knowledge of coding driver genes and their pathway annotations as priors to assist in  
61 detection of weak driver variants including those in the non-coding genome<sup>1</sup>. The PCAWG project  
62 has produced a consensus dataset of predicted protein-coding driver genes (CDS) and non-  
63 coding regions of 5' and 3' untranslated elements (UTRs), promoters and enhancers of protein-  
64 coding genes across 2,583 whole cancer genomes of multiple cancer types<sup>14</sup>. Driver gene p-  
65 values in the dataset reflect the frequency and functional impact of somatic single nucleotide  
66 variants (SNVs) and small insertions-deletions (indels) in these protein-coding and non-coding  
67 genomic regions. Here we used our ActivePathways method to interpret these driver predictions  
68 with pathway information including biological processes of Gene Ontology<sup>15</sup> and molecular  
69 pathways defined by Reactome<sup>16</sup>. Two further case studies focused on prognostic molecular  
70 pathways of breast cancer through integration of genomic and transcriptional alterations, and  
71 gene regulatory networks associated with organ growth control in healthy human tissues.

72

## 73 **Results**

### 74 **Multi-omics pathway enrichment analysis with ActivePathways**

75 ActivePathways is a simple four-step method that extends our earlier work<sup>9</sup> (**Figure 1**). It requires  
76 two input datasets. First, a table of *gene p-values* contains multiple p-values for every gene  
77 representing different types of evidence such as gene significance in distinct omics experiments.  
78 These could include p-values evaluating the significance of differential gene expression in tissues  
79 of interest, gene essentiality, mutation or copy number alteration burden, and many others.  
80 Second, a collection of *gene sets* represents molecular pathways, biological processes and other  
81 gene annotations we refer to as *pathways*. Depending on the hypothesis, pathways may also  
82 include other types of gene sets such as targets of transcription factors or microRNAs. In the first  
83 step of ActivePathways, we derive an integrated gene list that aggregates significance from all  
84 types of evidence for each input gene. The integrated gene list is compiled by fusion of gene  
85 significance from different types of evidence using the Brown's extension<sup>17</sup> of the Fisher's  
86 combined probability test, which conservatively adjusts for overall correlations of p-values in  
87 estimating the overall significance of every gene. The integrated input gene list is then ranked by  
88 decreasing significance and filtered using a lenient cut-off to capture a long tail of candidate genes  
89 and to filter the bulk of insignificant ones (unadjusted  $P_{gene} < 0.1$ ). The integrated gene list is  
90 analyzed with a ranked hypergeometric test for each pathway to capture smaller pathways tightly  
91 associated with few top-ranking genes and broader processes with abundant albeit weaker  
92 signals from larger subsets of input genes. The stringent family-wise multiple testing correction

ActivePathways: Paczkowska, Barenboim, *et al.*

93 method by Holm<sup>18</sup> is applied across pathways to reduce false positives ( $Q_{pathway} < 0.05$ ). In the third  
 94 step, candidate gene lists corresponding to distinct types of evidence are separately evaluated  
 95 using the above procedure. This step determines which pathways are significantly supported by  
 96 each of the input omics datasets and also reveals corresponding genes in each pathway.  
 97 Importantly, the step also highlights pathways that are only found through data integration and  
 98 are not apparent in any single type of omics evidence alone. In the fourth step, the method  
 99 provides input files for Enrichment Map<sup>19</sup> for visualizing and reducing the redundant set of all  
 100 detected pathways to a narrower, focused network of biological themes.

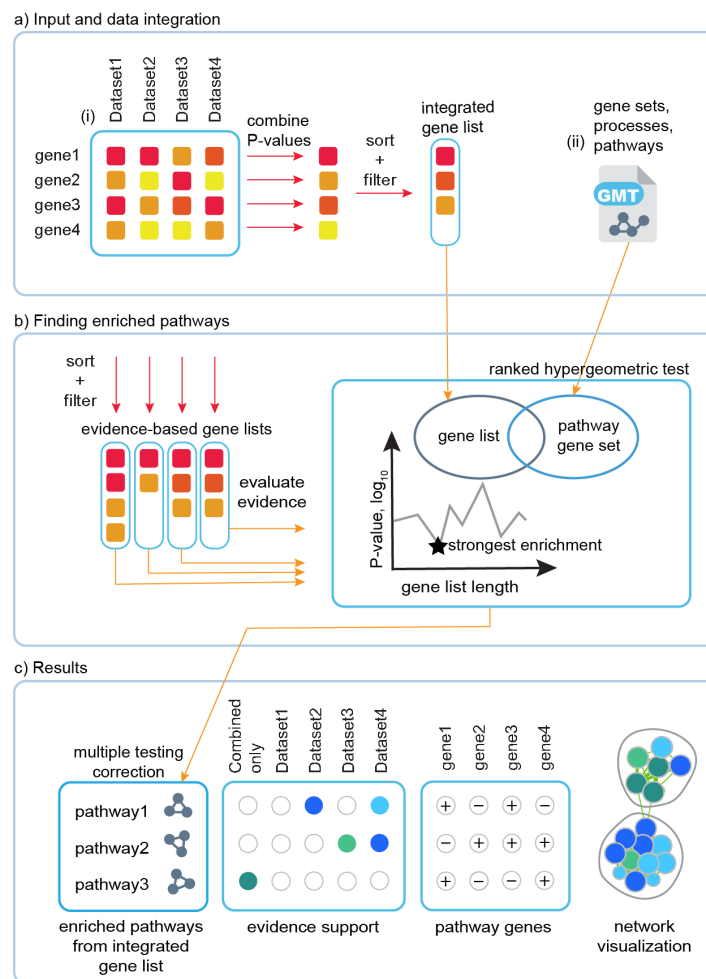

101

102 **Figure 1: Method overview.** (a) ActivePathways requires as input (i) a matrix of gene P-values for different omics  
 103 datasets, and (ii) a collection of gene sets corresponding to biological pathways and processes. Gene p-values are  
 104 merged and filtered to produce an integrated gene list that combines evidence from omics datasets and is ranked by  
 105 decreasing significance with a lenient threshold. (b) Pathway enrichment analysis is conducted on the integrated gene  
 106 list as well as lists from individual omics datasets using the ranked hypergeometric test that determines the optimal  
 107 level of enrichment in the ranked gene sub-list for every pathway. (c) Pathways enriched in the integrated gene list are  
 108 corrected for multiple testing and significant findings are reported as results. Pathways enriched in individual omics

ActivePathways: Paczkowska, Barenboim, *et al.*

109 *datasets are labelled by supporting evidence (colored nodes), and pathways only enriched in the integrated gene list*  
110 *are highlighted separately. Pathway genes with significant signals in different omics data are also shown. Finally,*  
111 *datasets of enriched pathways provided by ActivePathways are visualized as enrichment maps in Cytoscape where*  
112 *nodes correspond to pathways and pathways with many shared genes are connected into networks representing*  
113 *broader biological themes.*

114

## 115 **Pathway analysis of coding and non-coding mutations in 2,500 whole cancer genomes**

116 We performed integrative pathway analysis of coding and non-coding driver predictions across  
117 29 cancer patient cohorts of histological tumor types and 18 meta-cohorts combining multiple  
118 types of tumors, with 47 cohorts in total (**Supplementary Table 1**). ActivePathways found at least  
119 one significantly enriched process or pathway in the majority of these cohorts (42/47 or 89%,  
120  $Q_{pathway} < 0.05$ ) (**Figure 2a**). We analyzed the omics evidence supporting predictions of enriched  
121 pathways and found that most cohorts showed enrichments in pathways supported by protein-  
122 coding driver scores of genes (37/47 or 79%). This serves as a positive control since the majority  
123 of currently known cancer driver genes have frequent protein-coding mutations.

124 Non-coding mutations in genes also contributed to the discovery of frequently mutated biological  
125 processes and pathways: 24/47 cohorts (51%) showed significantly enriched pathways that were  
126 apparent when only analyzing non-coding driver scores separately for UTRs, promoters or  
127 enhancers. The majority of cohorts (41/47 or 87%) revealed enriched pathways that were  
128 apparent in the integrated gene list but not in any gene lists ranked by element-specific driver  
129 scores, emphasizing the value of our integrative approach. As expected, cohorts with more patient  
130 tumor samples generated more significantly enriched pathways (Spearman  $\rho = 0.74$ ,  $P = 2.3 \times 10^{-9}$ ;  
131 **Supplementary Figure 1**), suggesting that larger datasets are better powered to distinguish  
132 rarely mutated genes involved in biological pathways and processes. Discovery of pathways  
133 enriched in non-coding mutations suggests that pathway analysis is an attractive strategy for  
134 illuminating the dark matter of the non-coding cancer genome.

ActivePathways: Paczkowska, Barenboim, *et al.*

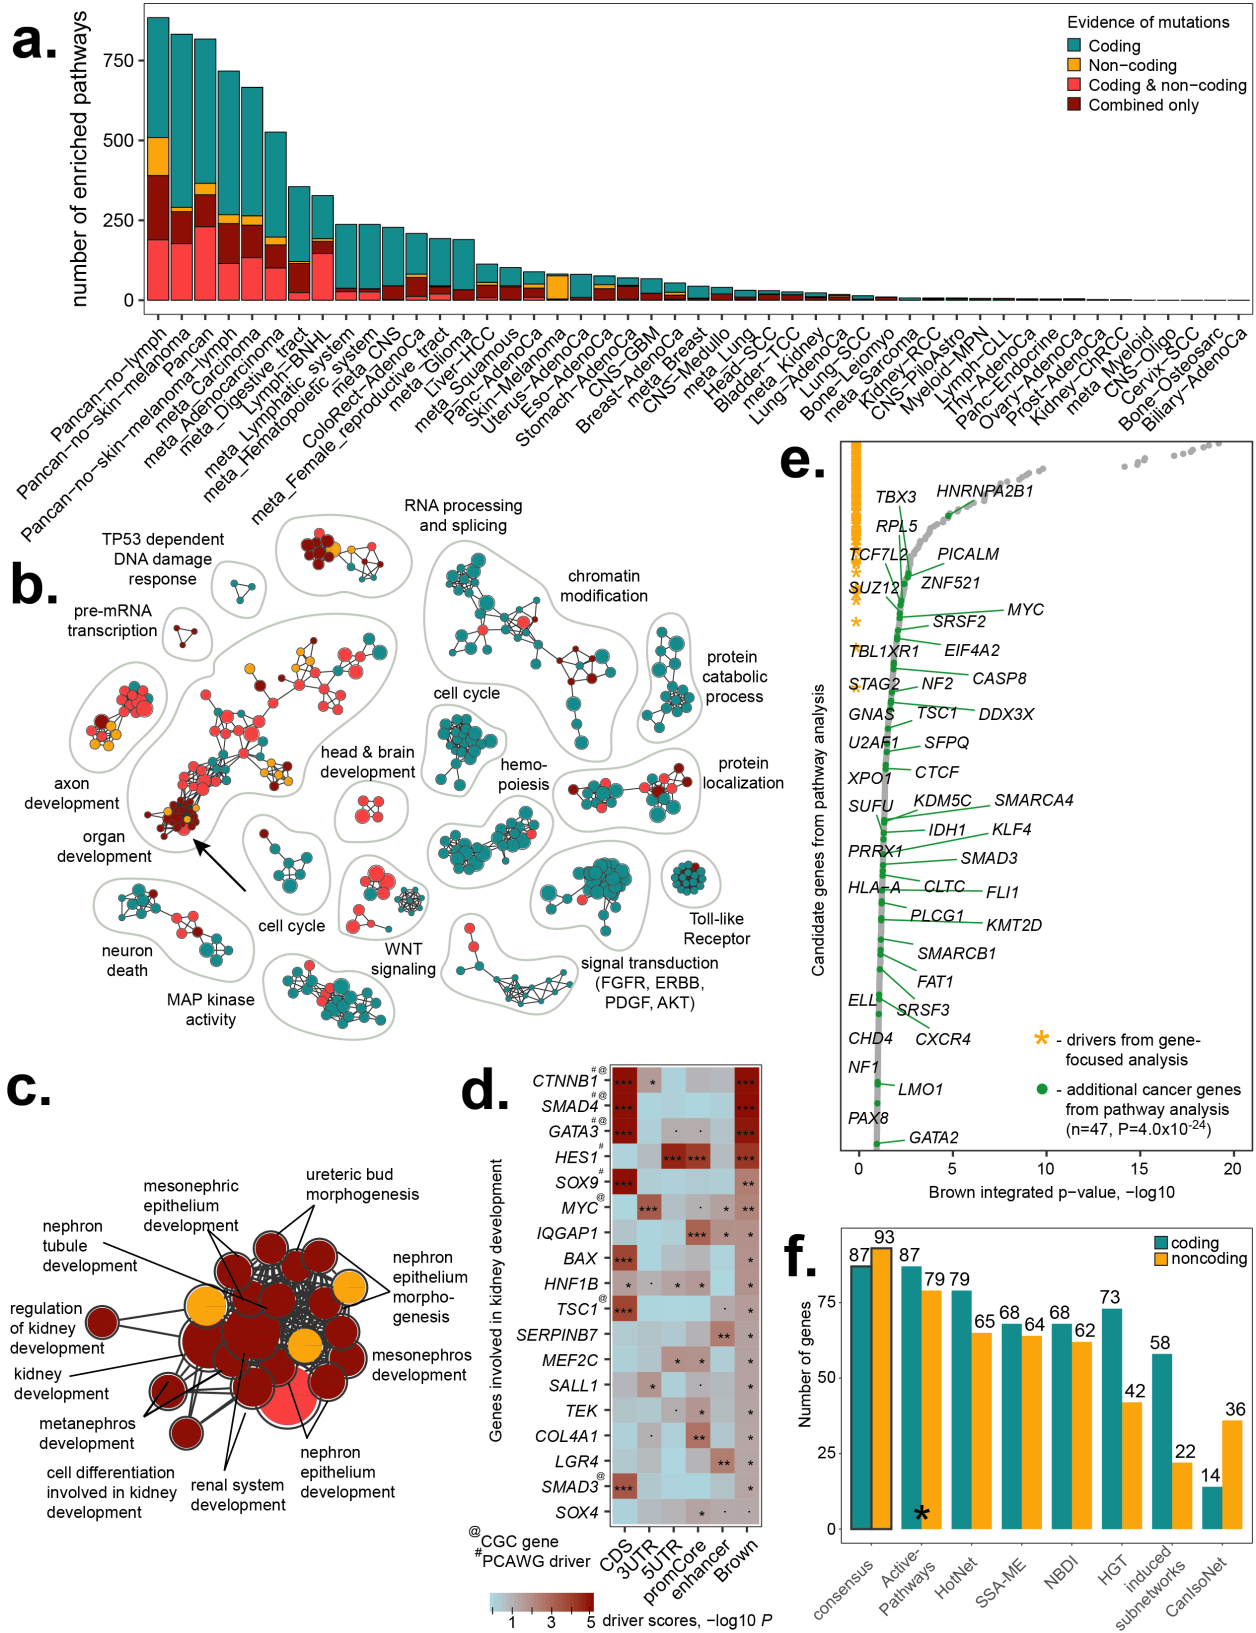

ActivePathways: Paczkowska, Barenboim, *et al.*

136 **Figure 2. Pathway enrichment analysis of cancer driver genes with ActivePathways.** (a) We analyzed consensus  
137 driver genes with frequent somatic mutations by integrating mutation scores of protein-coding and non-coding  
138 sequences (promoters, enhancers, and untranslated regions) across 47 cohorts of cancer patients with whole genome  
139 sequencing data from tumors. Bar plot shows number of significantly enriched pathways ( $Q < 0.05$ ) stratified by  
140 supporting evidence from driver predictions. The majority of pathways detected by ActivePathways are supported by  
141 protein-coding mutations, as expected (dark green bars), while non-coding mutations (orange, red) reveal additional  
142 pathways. Pathways shown in dark red are found only in the integrated gene list of coding and non-coding mutations  
143 but not in gene lists of individual mutation scores. (b) Enrichment map shows groups of statistically significant pathways  
144 characteristic of mutated genes in the adenocarcinoma cohort of 1,773 tumors. Nodes in the network diagram represent  
145 pathways that are connected with edges if the pathways are similar and share many genes. Groups of similar pathways  
146 were annotated manually. Nodes are colored by supporting evidence from coding and non-coding cancer mutations.  
147 (c) The group of enriched kidney developmental processes is apparent from integrated evidence of coding and non-  
148 coding mutations but is not found among coding or non-coding candidate genes separately (indicated with arrow in  
149 enrichment map). (d) P-value heatmap shows driver scores of genes involved in kidney developmental processes  
150 ranked by combined p-values of the integrated gene list (rightmost column). Top genes are expectedly detected as  
151 significantly mutated driver genes in the PCAWG consensus list while additional pathway-derived genes of the long tail  
152 of infrequent mutations are highlighted as well. Genes listed in the Cancer Gene Census (CGC) database are indicated  
153 with @-symbol. (e) Integrated list of adenocarcinoma candidate driver genes used in the pathway enrichment analysis  
154 includes the majority of driver genes detected in the gene-focused consensus analysis by PCAWG (orange asterisks)  
155 and a long tail of infrequently mutated genes ranked by decreasing significance. Additional known cancer genes  
156 detected in the pathway analysis are indicated with green dots and occur more frequently than expected from chance  
157 alone. (f) Comparison of ActivePathways with six additional pathway and network analysis methods used in the  
158 PCAWG project. ActivePathways best recovers the consensus lists of pathway-implicated driver (PID) genes with  
159 coding and non-coding mutations. The consensus lists are shown in the leftmost bars of the plot and have been  
160 compiled through a majority vote of the seven methods in the PCAWG pathway and network analysis working group.

161 We studied the adenocarcinoma meta-cohort with 1,773 samples of 16 tumor types whose  
162 integrated list of 432 candidate genes (unadjusted  $P_{gene} < 0.1$ ) associated with 526 significantly  
163 enriched pathways ( $Q_{pathway} < 0.05$ ) (**Figure 2b**). As expected, the majority of pathways were only  
164 supported by genes with frequent coding mutations (328/526 or 62%). However, 101 pathways  
165 were supported by both coding and non-coding gene mutations, 72 were only apparent in the  
166 integrated analysis of all evidence, and 25 were only found among genes with significant non-  
167 coding mutations, thus expanding the set of candidate driver mutations in the non-coding cancer  
168 genome and demonstrating the value of integrative pathway analysis.

169 The major biological themes with frequent protein-coding mutations included hallmark cancer  
170 processes like *apoptotic signaling pathway* (24 genes;  $Q_{pathway} = 4.3 \times 10^{-5}$ ) and *mitotic cell cycle* (8  
171 genes;  $Q_{pathway} = 0.0026$ ), and additional biological processes such as chromatin modification and  
172 RNA splicing that are increasingly recognized in cancer biology. Thus, our method captures the  
173 expected cancer pathways among driver genes with protein-coding mutations as positive controls.

ActivePathways: Paczkowska, Barenboim, *et al.*

174 In contrast to these solely protein-coding driver associations, a large group of developmental  
175 processes and signal transduction pathways was enriched in genes with coding as well as non-  
176 coding mutations; for example *embryo development process* was supported by mutations in  
177 exons, 3'UTRs and gene promoters (68 genes;  $Q_{\text{pathway}}=2.9 \times 10^{-12}$ ), while *repression of WNT target*  
178 *genes* was only apparent in the integrated analysis of coding and non-coding mutations but not  
179 in either alone (5 genes,  $Q_{\text{pathway}}=0.016$ ; REAC:4641265). Thus, our method evaluates  
180 contribution of omics evidence towards pathway enrichments and finds additional associations  
181 that are not apparent in any provided dataset.

182

### 183 **ActivePathways highlights pathway-associated cancer genes in the long tail of infrequent** 184 **non-coding mutations**

185 We focused on a group of processes involved in kidney development that were only detected in  
186 the integrated analysis (**Figure 2c-d**). ActivePathways found 18 genes involved in these  
187 processes, only five of which were predicted as driver genes in the consensus driver analysis of  
188 the PCAWG project<sup>14</sup>. Additional known cancer genes included the oncogene *MYC* with 13  
189 patients with 3'UTR mutations ( $P_{\text{UTR3}}=4.8 \times 10^{-4}$ ;  $Q_{\text{UTR3}}=0.42$ ), the transcription factor *SMAD3* of  
190 the TGF- $\beta$  pathway with 14 patients with protein-coding mutations ( $P_{\text{CDS}}=4.0 \times 10^{-4}$ ;  $Q_{\text{CDS}}=0.37$ )  
191 and the growth inhibitory tumor suppressor gene *TSC1* with 23 patients with protein-coding  
192 mutations ( $P_{\text{CDS}}=1.4 \times 10^{-4}$ ;  $Q_{\text{CDS}}=0.17$ ) as well as candidate cancer genes such as *IQGAP1* with  
193 10 patients with promoter mutations ( $P_{\text{promoter}}=8.2 \times 10^{-4}$ ;  $Q_{\text{promoter}}=0.62$ ) that encodes a signaling  
194 protein that regulates cell motility and morphology. The additional genes remained below the  
195 FDR-adjusted significance cut-off in the gene-focused consensus driver analysis, however were  
196 found by ActivePathways due to pathway associations with frequently mutated developmental  
197 genes. These results highlight the potential of our method to find known and candidate cancer  
198 genes with rare coding and non-coding driver mutations through pathway-driven data integration.

199 We evaluated 333 candidate driver genes from the pathway analysis of the adenocarcinoma  
200 cohort (**Figure 2e**). These included as positive controls 60/64 significantly mutated genes  
201 identified in the PCAWG consensus driver analysis<sup>14</sup>, and an additional 47 genes of the COSMIC  
202 Cancer Gene Census database<sup>12</sup>, significantly more than expected by chance alone (seven  
203 genes expected, Fisher's exact  $P=4.0 \times 10^{-24}$ ), including *MYC*, *IDH1*, *NF1*, and *BCL9*. Additional  
204 genes were detected for several reasons. First, the integrated gene list was filtered using a lenient  
205 statistical cut-off ( $P_{\text{gene}} < 0.1$ ) compared to a more stringent gene-focused driver analysis  
206 ( $Q_{\text{gene}} < 0.05$ ). This resulted in 273/333 pathway-associated genes of the long tail that remained



ActivePathways: Paczkowska, Barenboim, *et al.*

207 below the significance threshold in the driver analysis. Second, the integration procedure  
208 combined multiple weaker p-values (coding regions, promoters, UTRs, enhancers) to a single  
209 stronger p-value for 17/333 pathway-associated genes including six cancer genes (*HNRNPA2B1*,  
210 *STAG2*, *TCF7L2*, *SUZ12*, *CLTC*, *ZNF521*) and improved the overall ranking of 220/333 genes  
211 among the input data, better explaining their membership in pathways and processes. However,  
212 a majority of all genes showed reduced significance after the integration procedure and were  
213 excluded from the pathway analysis, as the Brown combined p-value remained below the  
214 significance cut-off compared to any individual p-values of mutations in coding and non-coding  
215 regions of genes (3,112/3,543 or 88% genes with unadjusted  $\min(P_{gene}) < 0.1$  showed unadjusted  
216 Brown  $P_{gene} > 0.1$ ). Fourth, the evidence evaluation step of the method identified pathway  
217 enrichments in gene lists ranked by individual sources of evidence and highlighted additional  
218 genes that did not pass significance cut-offs of the integration procedure. Thus, ActivePathways  
219 finds additional cancer genes in the long tail of mutations that are highlighted due to their pathway  
220 associations but remain below the significance cut-off in the gene-by-gene analysis.

221

## 222 **Benchmarking demonstrates the robustness and sensitivity of ActivePathways**

223 We carefully benchmarked ActivePathways using multiple approaches. First, we compared its  
224 performance with six diverse methods used in the PCAWG pathway and network analysis working  
225 group<sup>20</sup> (Hierarchical HotNet<sup>21,22</sup>, SSA-ME<sup>23</sup>, NBDI<sup>24</sup>, induced subnetwork analysis<sup>22</sup>,  
226 CanIsoNet<sup>[Kahraman et al, in prep]</sup>, and hypergeometric test). The methods used molecular pathway and  
227 network information to analyze the PCAWG dataset of predicted cancer driver genes<sup>14</sup>, and a  
228 subsequent consensus procedure derived pathway-implicated driver (PID) gene lists with coding  
229 (PID-C) and non-coding (PID-N) mutations based on a majority vote. Our method recovered PID-  
230 C and PID-N gene lists with the highest accuracy: 100% of coding driver genes (87/87) and 85%  
231 of non-coding candidates (79/93) were detected (**Figure 2f**).

232 We evaluated the robustness of ActivePathways to parameter variations and missing data. We  
233 varied the parameter  $P_{gene}$  that determines the ranked gene lists used in the pathway enrichment  
234 analysis (default threshold  $P_{gene} < 0.1$ ). The majority of cohorts (40/47 or 85%) retrieved  
235 significantly enriched pathways even with a considerably more stringent threshold ( $P_{gene} < 0.001$ ),  
236 however 67% fewer pathways were found compared to the default threshold in the median cohort  
237 (**Supplementary Figure 2**). We then evaluated the robustness of ActivePathways to missing data  
238 by randomly removing subsets of driver scores from the initial dataset. Even when removing 50%  
239 of gene driver scores with  $P < 0.001$ , the majority of cohorts (37/47 or 79%) were found to have at

ActivePathways: Paczkowska, Barenboim, *et al.*

240 least one significantly enriched pathway however 66% fewer pathways were found on average  
241 **(Supplementary Figure 3).**

242 We tested ActivePathways with data simulations through 1,000 datasets for each of 47 patient  
243 cohorts and found no significant pathways in 92% of simulations **(Supplementary Figure 4).**  
244 Simulated data were obtained by randomly reassigning driver scores to different genomic  
245 elements, a conservative approach that disrupts gene and pathway annotations while retaining  
246 strong scores in the data. The median family-wise false discovery rate across cohorts (7.2%)  
247 slightly exceeded the applied multiple testing correction ( $Q < 0.05$ ). Higher rates were observed in  
248 cohorts including melanoma tumors, potentially due to abundant promoter mutations caused by  
249 impaired nucleotide excision repair in protein-bound genomic regions<sup>25</sup>. We evaluated quantile-  
250 quantile (QQ) plots of pathway-based p-values from ActivePathways and found that p-values from  
251 observed gene scores often deviated from the expected uniform distribution and appeared  
252 statistically inflated **(Supplementary Figure 5)**. However, p-values derived from simulated gene  
253 scores showed no inflation in our simulations. Anticipating that the strongest cancer driver scores  
254 associate with protein-coding sequence, we studied datasets with simulated protein-coding gene  
255 scores and true non-coding scores. As expected, these partially simulated datasets expectedly  
256 showed less p-value inflation, suggesting that highly significant known cancer genes involved in  
257 many different pathways are responsible for inflation. Statistical testing of highly redundant  
258 pathways and processes violates the independence assumption of statistical tests and multiple  
259 testing procedures, a known caveat of pathway enrichment analysis<sup>1,2</sup>, which likely explains the  
260 observed distribution of significance values of our method.

261 Collectively, these benchmarks show that ActivePathways is a sensitive and robust method for  
262 detecting significantly enriched pathways and processes through integrative analysis of  
263 multivariate omics data.

264

## 265 **Clinical analysis of genomic and transcriptional alterations of breast cancer subtypes** 266 **reveals prognostic value of apoptotic, immune response and ribosomal genes**

267 To demonstrate an integrative analysis of patient clinical information with multiple types of omics  
268 data, we then studied the pathways and processes associated with patient prognosis in breast  
269 cancer. We leveraged the METABRIC dataset<sup>26</sup> using 1,780 breast cancer samples drawn from  
270 all four subtypes (HER2-enriched, basal-like, luminal-A, luminal-B) and evaluated all genes using  
271 three types of prognostic evidence. Gene expression profiles were deconvolved as mRNA

ActivePathways: Paczkowska, Barenboim, *et al.*

272 abundance levels in tumor cells (TC) and tumor-adjacent cells (TAC) using the ISOpure  
273 algorithm<sup>27</sup> and associated with these data with patient survival using median dichotomization and  
274 log-rank tests. Gene copy number alterations (CNA) were included as the third type of evidence  
275 and associated with patient survival using log-rank tests.

276 ActivePathways highlighted 192 significantly enriched GO biological processes and Reactome  
277 pathways across the four subtypes, of which nine were enriched in multiple subtypes and 33 were  
278 only apparent through the integrative pathway analysis but not in any omics evidence alone.  
279 Enrichment maps of significant results revealed immune response, apoptosis, ribosome  
280 biogenesis and chromosome segregation as the major groups of prognosis-associated pathways  
281 (**Figure 3a**).

282 Immune activity was associated with prognostic genes in basal-like and HER2-enriched breast  
283 cancers with significant enrichment of GO processes such as immune system development  
284 ( $Q_{basal}=3.0 \times 10^{-4}$ , 113 genes;  $Q_{HER2}=0.035$ , 61 genes) and lymphocyte differentiation  
285 ( $Q_{HER2}=6.8 \times 10^{-4}$ , 46 genes;  $Q_{basal}=8.4 \times 10^{-4}$ , 45 genes). The majority of genes of immune system  
286 development were associated with improved patient prognosis upon increased gene expression  
287 in tumor cells or tumor-adjacent cells, comprising 50/61 genes in the HER2-enriched subtype and  
288 78/113 genes in the basal subtype (**Figure 3b**). Interestingly, only a minority of these genes (10)  
289 were significant in both of the two subtypes, suggesting different modes of immune activity in  
290 subtypes and emphasizing the power of our pathway-based approach. Basal-like breast cancers  
291 were associated with additional 67 terms involving immune response and blood cells, however  
292 no immune related terms were enriched for luminal subtypes of breast cancers. Prognostic  
293 features of immune-related genes in HER2-enriched and basal-like breast cancers are well  
294 known<sup>28,29</sup>. Our pathway-based findings indicate that immune activity in breast tumor cells and in  
295 the surrounding microenvironment negatively affect tumor progression and benefits the patient.

296 Apoptosis was associated with patient prognosis in HER2-enriched and luminal-A breast cancers  
297 through enriched GO processes such as negative regulation of apoptotic process ( $Q_{HER2}=0.030$ ,  
298 122 genes;  $Q_{luminalA}=0.015$ , 228 genes) and programmed cell death ( $Q_{HER2}=0.015$ , 125 genes;  
299  $Q_{luminalA}=0.016$ , 231 genes) (**Figure 3c**). Anti-apoptotic pathways were only detected in the  
300 integrative analysis and not in genomic and transcriptomic gene signatures separately. Among  
301 the genes negatively regulating apoptosis, *DUSP1* provided the strongest prognostic signal in  
302 HER2-enriched breast cancers. This was apparent in the molecular stratification of samples by  
303 mRNA of tumor cells (log-rank  $P_{TC}=0.019$ , HR=1.5) and tumor-adjacent cells ( $P_{TAC}=8.3 \times 10^{-4}$ ,  
304 HR=1.83) as well as gene copy number amplifications ( $P_{CNA}=9.8 \times 10^{-4}$ , HR=2.8) (**Figure 3d**).

ActivePathways: Paczkowska, Barenboim, *et al.*

305 *DUSP1* encodes a phosphatase signaling protein of the MAPK pathway that is over-expressed in  
306 malignant breast cancer cells and inhibits apoptotic signaling<sup>31</sup>. *HER2* over-expression is known  
307 to suppress apoptosis in breast cancer<sup>30</sup>. Anti-apoptotic signaling is a hallmark of cancer and  
308 expectedly associated with worse patient prognosis.

309 ActivePathways also identified prognostic pathway associations in single subtypes of breast  
310 cancer. For example, the prognostic genes for luminal-B subtype were enriched for chromosome  
311 segregation ( $Q_{luminalB}=0.017$ , 41 genes) and related biological processes of GO. In agreement with  
312 this finding, problems with chromosome segregation have been associated with worse outcome  
313 in breast cancer<sup>32</sup>. As another example, luminal-A breast cancers were associated with prognosis  
314 in ribosomal and RNA processing genes, such as ribosome biogenesis ( $Q_{luminalA}=6.9 \times 10^{-10}$ , 60  
315 genes), and rRNA metabolic process ( $Q_{luminalA}=1.8 \times 10^{-13}$ , 64 genes). Although not described  
316 specifically in the luminal-A subtype, ribosomal mRNA abundance has been shown to be  
317 prognostic in breast cancer as a marker of cell proliferation<sup>33,34</sup>. In summary, ActivePathways can  
318 be used for integrating clinical data with multi-omics information of molecular alterations. Such  
319 analyses can provide leads for functional studies and biomarker development.

ActivePathways: Paczkowska, Barenboim, *et al.*

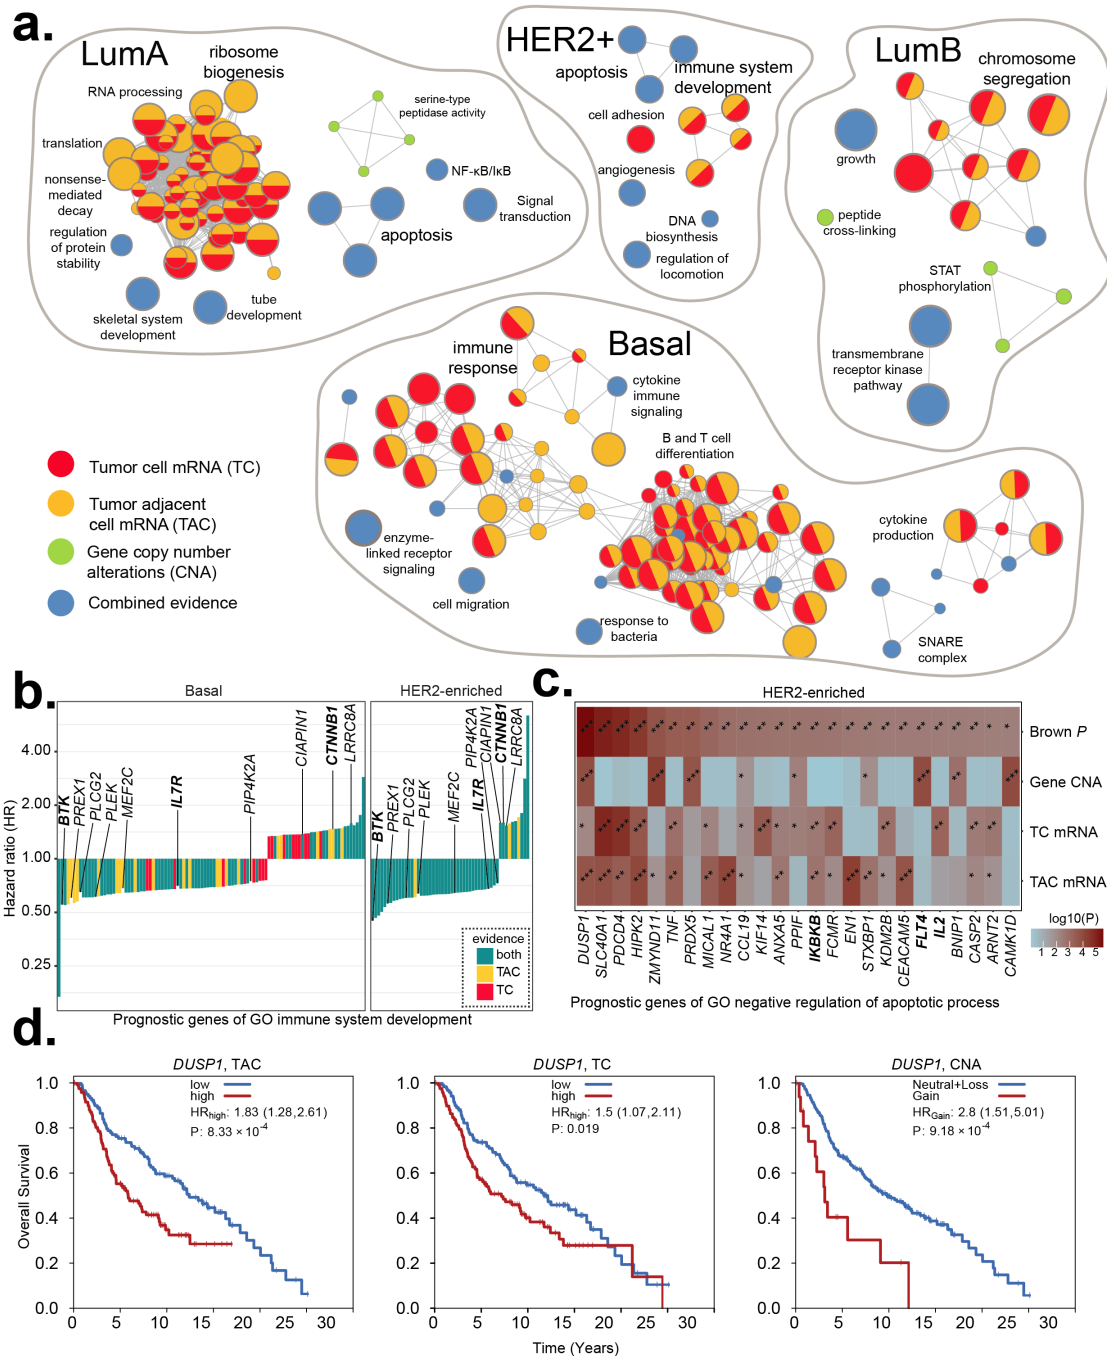

320

321

322

323

324

325

326

327

328

329

330

331

332

**Figure 3. Prognosis-associated pathways in four molecular subtypes of breast cancer.** (a) Enrichment maps of prognostic pathways and processes were found in an integrative analysis of mRNA abundance in tumor cells (TC), tumor-adjacent cells (TAC) and gene copy number alterations (CNA). Multi-colored nodes indicate pathways that were prognostic according to several types of molecular evidence. Blue nodes indicate pathways that were only apparent through merging of molecular signals. (b) Hazard ratios (HR) of prognostic genes of immune system development in basal and HER2-enriched subtypes of breast cancer. Strongest HR of TC, TAC is shown. Genes commonly found in basal and HER2-enriched tumors are shown. (c) Heatmap shows genes and corresponding p-values of the GO process “negative regulation of apoptotic process” found as prognostic in HER2-enriched breast cancer. Top row of the heatmap shows Brown p-values of merged evidence. (d) Kaplan-Meier plots show the strongest prognostic signal of the above apoptotic process associated with the DUSP1 encoding a protein phosphatase. DUSP1 significantly associates with reduced patient survival through increased tumor-adjacent mRNA level (left), increased tumor mRNA level (center) and gene copy number amplification (right). Known cancer genes are shown in boldface letters.

ActivePathways: Paczkowska, Barenboim, *et al.*

333 **Co-expression analysis of Hippo master regulators across 54 human tissues recovers**  
334 **associated biological processes and genes**

335 To study the use of ActivePathways in the context of healthy human tissues, we analyzed the  
336 dataset of 11,688 transcriptomes of 54 tissues from the GTEx project<sup>5</sup>, focusing on the Hippo  
337 signaling pathway involved in organ size control, tissue homeostasis and cancer<sup>35,36</sup>. We studied  
338 gene co-expression networks downstream of YAP and TAZ, the two master transcription factors  
339 of Hippo signaling, encoded by *YAP1* and *WWTR1*. YAP and TAZ are the evolutionarily  
340 conserved key effectors of the Hippo signaling in mammals. Inhibition of YAP/TAZ-mediated  
341 transcription regulates organ size control and tissue homeostasis in response to a wide range of  
342 intracellular and extracellular signals including cell-cell interactions, cell polarity, mechanical cues,  
343 ligands of G-protein-coupled receptors, and cellular energy status. We retrieved 2,117 putative  
344 Hippo transcriptional target genes that showed significant positive co-expression with either or  
345 both of the transcripts of *YAP* and *TAZ* across the human tissues in the GTEx dataset  
346 ( $Q_{gene} < 0.05$ ). We used a robust rank aggregation method<sup>37</sup> and retrieved transcriptional targets  
347 that were co-expressed with YAP or TAZ in a relatively large number of human tissues.

348 Analysis of the target genes using ActivePathways resulted in 101 significantly enriched pathways  
349 ( $Q_{pathway} < 0.05$ ), including 39 supported by both sets of target genes, 37 supported by YAP1  
350 targets, 18 supported by TAZ targets, and seven only apparent in the integrated list of target  
351 genes (**Figure 4**). The major biological themes of pathways and processes included regulation of  
352 cell polarity and cell junction, embryonic development, EGFR signaling, maintenance of stem cell  
353 population, actin cytoskeleton, and rho GTPase signaling that are all directly or indirectly related  
354 to Hippo signaling. We validated our analysis using 207 Hippo-related genes from review  
355 papers<sup>35,36</sup> and confirmed that 83/101 pathways found by ActivePathways contained at least one  
356 of 59 Hippo-related genes, while 41 pathways were significantly enriched in Hippo-related genes  
357 ( $Q < 0.05$ ). However, the majority of genes documented in the literature (148/207) were not  
358 detected in the pathway analysis, potentially due to their post-transcriptional regulation or tissue-  
359 specific roles. Our analysis highlights known and candidate genes and pathways related to Hippo  
360 signaling and showcases the use of ActivePathways for functional analysis of transcription  
361 regulatory networks.

ActivePathways: Paczkowska, Barenboim, *et al.*

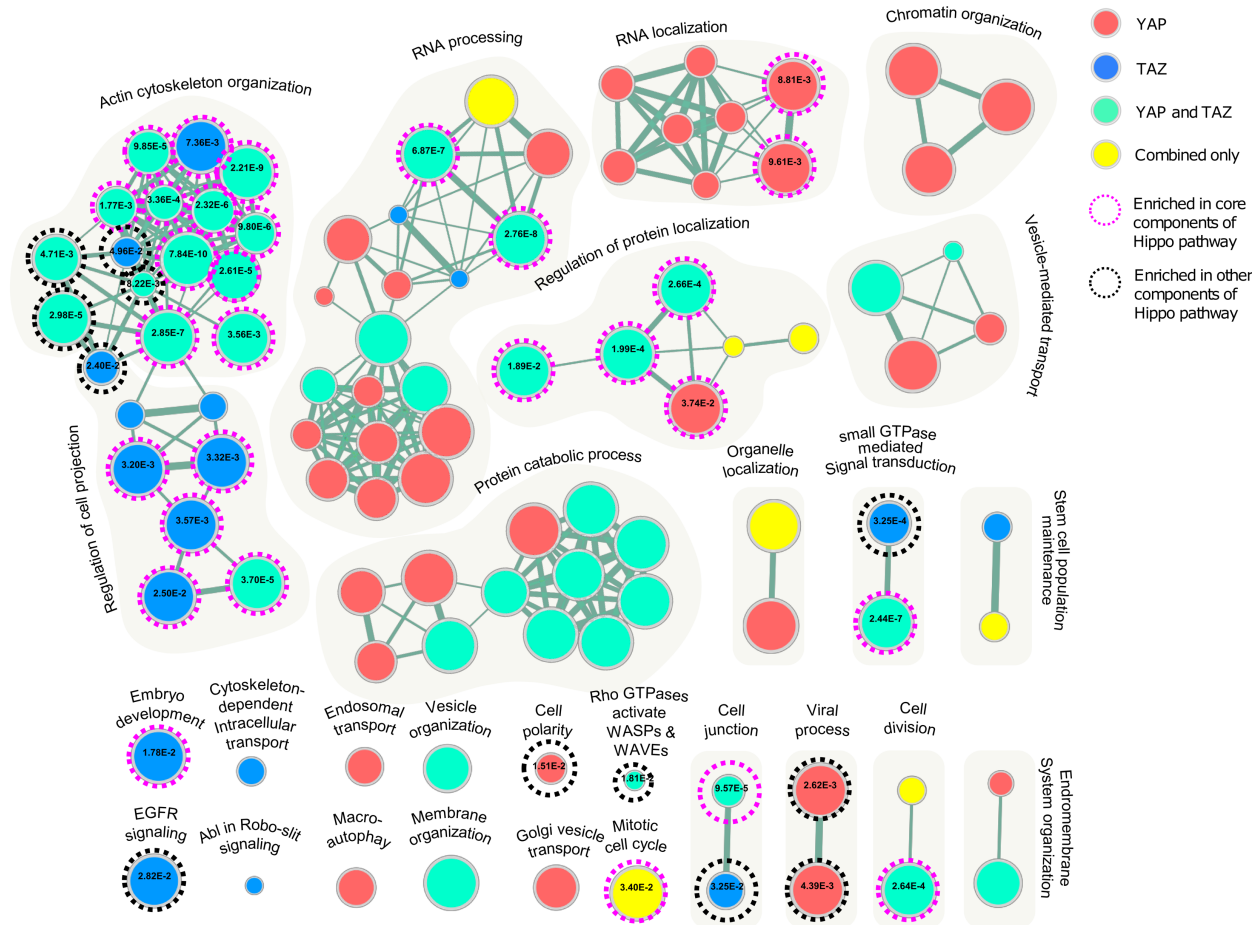

362

363 **Figure 4. Pathway enrichment analysis of Hippo co-expression targets across human tissues.** Enrichment map  
 364 of pathways characteristic of genes co-expressed with transcription factors YAP and TAZ of the Hippo pathway across  
 365 human tissues in the GTEx dataset. The Hippo pathway is involved in organ growth control and its predicted target  
 366 genes are enriched in related biological processes and pathways. Nodes represent significantly enriched pathways that  
 367 are colored by supporting evidence from co-expression targets of YAP or TAZ (red, blue), both transcription factors  
 368 (green) or only the integrated list of target genes (yellow). We validated the detected pathways using a list of Hippo-  
 369 related genes compiled from recent review papers and found that the majority of detected pathways included Hippo-  
 370 related genes and 40% of pathways were enriched in these genes (indicated with dotted circles, enrichment p-values  
 371 shown in nodes).

372

373 **Discussion**

374 Integrative pathway enrichment analysis helps distill thousands of high-throughput measurements  
 375 to a smaller number of pathways and biological themes that are most characteristic of the  
 376 experimental data, ideally leading to mechanistic insights and novel candidate genes for follow-  
 377 up studies. The primary advantage of our method is the fusion of gene significance across multiple

ActivePathways: Paczkowska, Barenboim, *et al.*

378 omics datasets. This allows us to identify additional pathways and processes that are not apparent  
379 individually in any analyzed dataset. In our example of cancer driver discovery, pathway analysis  
380 is complementary to gene-focused driver discovery as it also focuses on sub-significant genes  
381 with coding and non-coding mutations clustered into known and novel biological processes of  
382 cancer. In the clinical analysis of breast cancer subtypes, we find prognostic genes and pathways  
383 active in tumor cells, the microenvironment, or both. A subset of these findings, such as anti-  
384 apoptotic signaling, is only apparent through data integration.

385 Our general pathway analysis strategy is applicable to diverse kinds of omics datasets where  
386 well-calibrated p-values are available for the entire set of genes or proteins. One may study a  
387 series of genomic, transcriptomic, or proteomic experiments or combine these into a multi-omics  
388 analysis. Data from epigenomic experiments and genome-wide association studies can be  
389 analyzed after genome-wide signals have been appropriately mapped to genes. Clinical and  
390 phenotypic information of patients can be also included through association and survival statistics.  
391 Our method is expected to work with unadjusted as well as multiple-testing adjusted p-values,  
392 however it is primarily intended for un-adjusted p-values for increased sensitivity. P-value  
393 adjustment for multiple testing is conducted at the pathway level rather than at a gene level. P-  
394 values from omics datasets are easier to interpret than raw signals as gene-based p-values are  
395 expected to account for experimental and computational biases specific to each analyzed dataset,  
396 while accounting for multi-omics factors comprehensively in a single generally applicable  
397 pathway-based model would be likely impossible. In our example of cancer driver discovery,  
398 appropriately computed p-values account for confounding factors of somatic mutations such as  
399 gene sequence length and nucleotide content, mutation signatures active in different types of  
400 tumors<sup>38</sup> and biological cofactors of mutation frequency such as transcription and replication  
401 timing<sup>39</sup>, while pathway analysis of mutation counts or frequencies would maintain such biases in  
402 results.

403 Our analysis comes with important caveats. First, we only evaluate genes annotated in pathway  
404 databases that have variable coverage, rely on frequent data updates<sup>40</sup> and may miss novel  
405 sparsely annotated candidate genes. The most general pathway enrichment analysis considers  
406 biological processes and molecular pathways however many kinds of gene sets available in  
407 resources such as MSigDB<sup>41</sup> can be used to expand the scope of ActivePathways. Second,  
408 pathway information is highly redundant and analysis of rich *omics* datasets often results in many  
409 significant results reflecting the same underlying pathway. We address this redundancy by  
410 visualizing and summarizing pathway results as enrichment maps<sup>2,19</sup> that help distill general



ActivePathways: Paczkowska, Barenboim, *et al.*

411 biological themes comprised of multiple similar pathways and processes. Statistical inflation of  
412 results accompanied by biological redundancy is addressed by a stringent multiple testing  
413 correction. Third, the analysis treats pathways as gene sets and does not consider their  
414 interactions. This expands the scope of our analysis to a wider repertoire of pathways and  
415 processes as reliable mechanistic interactions are often context-specific and limited to a small  
416 subset of well-studied signaling pathways. Several methods such as HotNet<sup>21</sup>, PARADIGM<sup>42</sup> and  
417 GeneMania<sup>43</sup> model pathways and *omics* datasets through gene and protein interactions.

418 Translation of discoveries into improved human health through actionable mechanistic insights,  
419 biomarkers, and molecular therapies is a long-standing goal of biomedical research. Next-  
420 generation projects such as ICGC-ARGO (<https://www.icgcargo.org/>) aim to collect multi-*omics*  
421 datasets with detailed clinical profiles of patients and thus present novel challenges for pathway  
422 and network analysis techniques. In summary, ActivePathways is integrative pathway analysis  
423 method that improves systems-level understanding of cellular organization in health and disease.

## 424 **Methods**

425 **Integrated and evidence-based gene lists.** The main input of ActivePathways is a matrix of p-  
426 values where rows include all genes of a genome and columns correspond to *omics* datasets. To  
427 interpret multiple *omics* datasets, a combined p-value was computed for each gene using a data  
428 fusion approach, resulting in an integrated gene list. The integrated gene list was computed gene-  
429 by-gene by merging all p-values of a given gene into one combined p-value using the Brown's  
430 extension<sup>17</sup> of the Fisher's combined probability test that accounts for overall co-variations of p-  
431 values from different sources of evidence. The integrated gene list of Brown p-values was ranked  
432 in order of decreasing significance and filtered using a lenient threshold of unadjusted  $P < 0.1$ .  
433 Evidence-based gene lists representing different *omics* datasets were based on ranked P-values  
434 from individual columns of the input matrix, using the same significance threshold.

435 **Statistical enrichment of pathways.** Statistical enrichment of pathways in significance-ranked  
436 lists of candidate genes was carried out with the ranked hypergeometric test. The test considered  
437 one pathway gene set at a time and analyzed increasing subsets of input genes from the top of  
438 the ranked gene list. The same procedure was used for integrated and evidence-based gene lists.  
439 At each iteration, the test computed the hypergeometric enrichment statistic and P-value for the  
440 set of genes shared by the pathway and top sub-list of the input gene list. For optimal processing  
441 speed, only gene lists ending with a pathway-related gene were considered as these most impact  
442 significance of enrichment. The ranked hypergeometric statistic selected the input gene sub-list

ActivePathways: Paczkowska, Barenboim, *et al.*

443 that achieved the strongest enrichment and the smallest p-value as the final result for the given  
444 pathway, as

445 
$$(P_{\text{pathway}}, G) = \{\min, \arg \min\}_n \sum_{x=k}^{\min(n, K)} \frac{\binom{K}{k} \binom{N-K}{n-k}}{\binom{N}{n}}$$

446 where  $P_{\text{pathway}}$  stands for the hypergeometric P-value of the pathway enrichment at the optimal  
447 sub-list of the significance-ranked candidate genes,  $G$  represents the length of the optimal sub-  
448 list, i.e. the number of top genes from the input gene list,  $N$  is the number of protein-coding genes  
449 with annotations in the pathway database, i.e., in Gene Ontology and Reactome,  $K$  is the total  
450 number of genes in a given pathway,  $n$  is the number of genes in a given gene sub-list considered,  
451 and  $k$  is the number of pathway genes in the considered sub-list. For a conservative estimate of  
452 pathway enrichment, we considered as background  $N$  the universe of genes contained in pathway  
453 databases and ontologies rather than the complete repertoire of protein-coding genes. To obtain  
454 candidate genes involved in the pathway of interest, we intersected pathway genes with the  
455 optimal sub-list of candidate genes. The ranked hypergeometric p-value was computed for all  
456 pathways and resulting p-values were corrected for multiple testing using the conservative Holm-  
457 Bonferroni family-wise error rate (FWER) method<sup>18</sup>. Significant pathways were reported ( $Q < 0.05$ ).

458 **Evaluating omics evidence of enriched pathways.** The integrated gene list was analyzed the  
459 using ranked hypergeometric test and enriched pathways were reported as results. Each  
460 evidence-based gene list representing an omics dataset was also analyzed for enriched pathways  
461 with the ranked hypergeometric test. Pathways found in the integrated gene list were labelled for  
462 supporting evidence if they were also found as significant in any evidence-based gene list. A  
463 pathway was considered to be found only through data integration and labelled as *combined-only*  
464 if it was identified as enriched in the integrated gene list but was not identified as enriched in any  
465 of the evidence-based gene lists at equivalent significance cutoffs ( $Q < 0.05$ ). Each detected  
466 pathway was additionally annotated with pathway genes apparent in the optimal sub-list of  
467 candidate genes, separately for the integrated gene list and each evidence-based gene list.

468 **Gene scores of cancer mutations.** We analyzed p-values of genes reflecting their statistical  
469 significance as candidate cancer drivers for multiple cohorts of cancer patients with whole  
470 genome sequencing data. The scores were compiled in the driver discovery analysis of the  
471 PCAWG project as a consensus of multiple independent methods<sup>14</sup>. The input matrix of gene  
472 scores ( $P$ -values) included all protein-coding genes as rows and their genomic elements as  
473 columns (exons, 5' and 3' untranslated regions (UTRs), promoters, enhancers). Elements with  
474 missing p-values were assigned  $P=1$ . Genes with multiple enhancers were assigned the score of

ActivePathways: Paczkowska, Barenboim, *et al.*

475 the most significant enhancer, and enhancers with more than five associated genes were  
476 excluded prior to selection.

477 **Pathways and processes.** We used gene sets corresponding to biological processes of Gene  
478 Ontology<sup>15</sup> and molecular pathways of the Reactome database<sup>16</sup> downloaded from the g:Profiler  
479 web server<sup>9</sup>. Large general gene sets with more than a thousand genes and small specific gene  
480 sets with less than five genes were excluded.

481 **Enrichment map visualization.** ActivePathways provides input files for the EnrichmentMap  
482 app<sup>19</sup> of Cytoscape<sup>45</sup> for network visualization of similar pathways and their coloring according to  
483 supporting omics evidence. Enrichment maps for adenocarcinoma driver mutations, breast  
484 cancer prognostics, and Hippo transcriptional networks were visualized with stringent pathway  
485 similarity scores (Jaccard and overlap combined coefficient 0.6) and manually curated for the  
486 most representative groups of similar pathways and processes. Singleton pathways that were  
487 redundant with larger groups of pathways were discarded. Coloring of pathways in the  
488 adenocarcinoma enrichment map was rearranged by merging colors of pathways supported by  
489 non-coding mutation scores of promoters, enhancers and/or UTRs into one group.

490 **Analysis of coding and non-coding mutations of the PCAWG pan-cancer dataset.** We used  
491 ActivePathways to analyze driver predictions of coding and non-coding mutations across >2,500  
492 whole cancer genomes of the ICGC-TCGA PCAWG Project. P-values of driver predictions were  
493 computed separately for protein-coding sequences, promoters, enhancers and untranslated  
494 regions (UTR3, UTR5) in the PCAWG driver discovery study by Rheinbay *et al*<sup>14</sup> across multiple  
495 subsets of samples representing histological tumor types and pan-cancer cohorts. We used gene-  
496 enhancer mapping predictions provided by PCAWG, excluded enhancers with more than five  
497 target genes, and selected the most significant enhancer for each gene, if any. Unadjusted p-  
498 values for coding sequences, promoters, enhancers and UTRs were compiled as input matrices  
499 and analyzed as described above. Missing p-values were interpreted as ones. Results from  
500 ActivePathways were validated with two lists of cancer genes. Predicted drivers from the gene-  
501 focused PCAWG driver analysis<sup>14</sup> were selected as statistically significant findings ( $Q < 0.05$ )  
502 following a stringent multiple testing correction spanning all types of elements (exons, UTRs,  
503 promoter, enhancers). The curated list of known cancer genes was retrieved from the COSMIC  
504 Cancer Gene Census (CGC) database<sup>12</sup>. One-tailed Fisher's exact tests were used to estimate  
505 enrichment of these genes using all protein-coding genes as background.

506 **Analysis of prognostic genes in breast cancer.** ActivePathways was used to evaluate  
507 prognostic pathways in breast cancer using multiple types of omics data. mRNA gene expression

ActivePathways: Paczkowska, Barenboim, *et al.*

508 data and gene copy number alteration (CNA) data of the were derived from the METABRIC cohort  
509 of 1,991 patients with a single primary fresh frozen breast cancer specimen each<sup>26</sup>. Curtis *et al*<sup>26</sup>  
510 classified the patients into the intrinsic breast cancer subtypes using the PAM50 mRNA-based  
511 classifier<sup>44</sup> resulting in 330 basal-like breast cancers, 238 HER2-enriched breast cancers, 721  
512 luminal-A breast cancers, 491 luminal-B breast cancers. Using these data, we computationally  
513 deconvolved tumor cell (TC) mRNA and tumor adjacent cell (TAC) mRNA abundance levels from  
514 the bulk profiled specimens. TC mRNA was deconvolved using ISOpure<sup>27</sup> run on MATLAB  
515 release 2010b. TAC mRNA was computed using the ISOpure.calculate.tac function from the R  
516 package ISOpureR v1.1.2. ISOpure was run independently for each breast cancer subtype. The  
517 mRNA univariate survival analysis was conducted as follows. For each gene, patients were  
518 dichotomized based on mRNA abundance. Dichotomization was either based on the median  
519 mRNA abundance for that gene or a fixed value of 6.5. Based on the mRNA abundance  
520 distribution of genes on the Y chromosome in female samples, 6.5 was estimated as the threshold  
521 for noise for non-expressed genes. Median dichotomization was used if the median was above  
522 6.5 or if there were no events in one of the groups when dichotomizing based on 6.5. The high  
523 and low mRNA abundance groups were compared by univariate log-rank tests for overall survival.  
524 TC and TAC mRNA abundance were evaluated independently. Survival modelling was performed  
525 in the R statistical environment (v3.4.3) using the survival package (v2.42-3). The CNA univariate  
526 survival analysis was conducted as follows. For each gene, we assessed whether more gains or  
527 losses were apparent. The copy number status with a higher count was subsequently used to  
528 separate patients into two groups: those with the chosen copy number status and the remaining  
529 patients. The two groups were then used for overall survival modelling with log-rank tests in the  
530 R statistical environment (v3.4.3) using the survival package (v2.42-3).

531 **Co-expression analysis of GTEx transcriptomes.** The RNAseq dataset of human tissues was  
532 downloaded from GTEx v7 data portal (<https://www.gtexportal.org/home/>). The dataset included  
533 transcript abundance values of 21,518 protein-coding genes in 11,688 samples across 54 tissues.  
534 Tissues with less than 25 available samples and low gene expression (mean TPM<1.0) were  
535 excluded from further analysis. Positive pairwise Pearson correlations of gene expression values  
536 of *YAP* and *TAZ* (symbols *YAP1*, *WWTR1*) and their putative target genes were investigated in  
537 individual tissues and ranked by statistical significance of correlation tests. Tissue-specific ranked  
538 correlations of target genes were then integrated into two master lists of target genes of *YAP* and  
539 *TAZ*, respectively, reflecting target genes that were consistently positively co-regulated with  
540 corresponding transcripts across a significant subset of considered human tissues. We used the  
541 robust rank aggregation (RRA) method developed by Kolde *et al*<sup>37</sup> and filtered co-expressed

ActivePathways: Paczkowska, Barenboim, *et al.*

542 genes by significance using the default parameters of RRA ( $Q_{gene} < 0.05$ ). Significantly enriched  
543 pathways among the putative target genes of YAP and TAZ were detected using ActivePathways.  
544 We validated the pathways by investigating their agreement with known Hippo-related genes from  
545 recent review papers<sup>35,36</sup>. We tested each pathway for enrichment of literature-derived Hippo  
546 genes using Fisher's exact tests and filtered significant findings after multiple testing correction  
547 ( $Q < 0.05$ ).

548 **Method benchmarking.** We benchmarked ActivePathways using multiple approaches, including  
549 simulated datasets, parameter variations, and partial replacement of strong scores with missing  
550 values. Benchmarking was carried out with the PCAWG dataset of coding and non-coding cancer  
551 driver predictions. To evaluate false discovery rates of ActivePathways, we created simulated  
552 datasets by randomly reassigning all observed driver scores to random genes and genomic  
553 elements. Simulations were conducted separately for different tumor cohorts. One thousand  
554 simulated datasets were analyzed with ActivePathways and those with at least one significantly  
555 detected pathway counted towards false discovery rates. Additional simulations maintained the  
556 positions of non-coding driver scores among gene scores and randomly reassigned protein-  
557 coding driver scores, expectedly leading to a reduction in detected pathways as the input datasets  
558 primarily included strong scores in protein-coding gene regions. Quantile-quantile analysis and  
559 QQ-plots were used to compare p-value distributions of pathways discovered from true driver  
560 scores, driver scores with shuffled driver scores, and driver scores shuffled entirely. To evaluate  
561 robustness of ActivePathways, we randomly replaced a fraction of significant driver p-values in  
562 input matrices ( $P < 0.001$ ) with insignificant p-values ( $P = 1$ ). We tested different fractions of missing  
563 values (10%, 25%, 50%) across a thousand datasets of driver scores with randomly selected  
564 missing data points and concluded that most cohorts included significantly enriched pathways  
565 even with large fractions of missing data. To further evaluate robustness, we tested different  
566 values of the Brown  $P$ -value threshold used to select the integrated gene list for pathway  
567 enrichment analysis. The default parameter value ( $P_{gene} < 0.1$ ) was compared to alternative values  
568 (0.001, 0.01, 0.05, 0.2). We concluded that ActivePathways found enriched pathways in most  
569 tumor cohorts even at more stringent gene selection levels.

570 **Availability.** ActivePathways is freely available as an R package and source code on the GitHub  
571 repository <https://github.com/reimandlab/ActivePathways> and the Comprehensive R Archive  
572 Network (CRAN).

573

574 **Acknowledgements**

ActivePathways: Paczkowska, Barenboim, *et al.*

575 This work was funded by Ontario Institute for Cancer Research (OICR) Investigator Awards to  
576 J.R. and P.C.B. provided by the Government of Ontario; Operating Grant to J.R. from Cancer  
577 Research Society (CRS) (#21089); Natural Sciences and Engineering Research Council of  
578 Canada (NSERC) Discovery Grant to J.R. (#RGPIN-2016-06485), and the Canada First  
579 Research Excellence Fund, University of Toronto Medicine by Design to J.R. H.Z. was supported  
580 by a CIHR Canadian Graduate Scholarship. J.B. was supported by a BioTalent Canada Student  
581 Internship. P.C.B. was supported by TFRI and CIHR New Investigator Awards.

582

## 583 **References**

- 584 1 Creixell, P. *et al.* Pathway and network analysis of cancer genomes. *Nat Methods* **12**, 615-  
585 621, doi:10.1038/nmeth.3440 (2015).
- 586 2 Reimand, J. *et al.* Pathway enrichment analysis of -omics data. *bioRxiv* **232835**,  
587 doi:10.1101/232835 (2017).
- 588 3 Weinstein, J. N. *et al.* The Cancer Genome Atlas Pan-Cancer analysis project. *Nature*  
589 *genetics* **45**, 1113-1120, doi:10.1038/ng.2764 (2013).
- 590 4 Hudson, T. J. *et al.* International network of cancer genome projects. *Nature* **464**, 993-  
591 998, doi:10.1038/nature08987 (2010).
- 592 5 GTEx Consortium. The Genotype-Tissue Expression (GTEx) project. *Nature genetics* **45**,  
593 580-585, doi:10.1038/ng.2653 (2013).
- 594 6 Subramanian, A. *et al.* Gene set enrichment analysis: a knowledge-based approach for  
595 interpreting genome-wide expression profiles. *Proc Natl Acad Sci U S A* **102**, 15545-  
596 15550, doi:10.1073/pnas.0506580102 (2005).
- 597 7 Mi, H., Muruganujan, A. & Thomas, P. D. PANTHER in 2013: modeling the evolution of  
598 gene function, and other gene attributes, in the context of phylogenetic trees. *Nucleic*  
599 *Acids Res* **41**, D377-386, doi:10.1093/nar/gks1118 (2013).
- 600 8 Kaimal, V., Bardes, E. E., Tabar, S. C., Jegga, A. G. & Aronow, B. J. ToppCluster: a  
601 multiple gene list feature analyzer for comparative enrichment clustering and network-  
602 based dissection of biological systems. *Nucleic Acids Res* **38**, W96-102,  
603 doi:10.1093/nar/gkq418 (2010).
- 604 9 Reimand, J. *et al.* g:Profiler-a web server for functional interpretation of gene lists (2016  
605 update). *Nucleic Acids Res* **44**, W83-89, doi:10.1093/nar/gkw199 (2016).
- 606 10 Stein, L. D., Knoppers, B. M., Campbell, P., Getz, G. & Korbel, J. O. Data analysis: Create  
607 a cloud commons. *Nature* **523**, 149-151, doi:10.1038/523149a (2015).
- 608 11 Campbell, P. J. *et al.* Pan-cancer analysis of whole genomes. *bioRxiv* **162784** (2017).
- 609 12 Futreal, P. A. *et al.* A census of human cancer genes. *Nat Rev Cancer* **4**, 177-183,  
610 doi:10.1038/nrc1299 (2004).
- 611 13 Huang, F. W. *et al.* Highly recurrent TERT promoter mutations in human melanoma.  
612 *Science* **339**, 957-959, doi:10.1126/science.1229259 (2013).

ActivePathways: Paczkowska, Barenboim, *et al.*

- 613 14 Rheinbay, E. *et al.* Discovery and characterization of coding and non-coding driver  
614 mutations in more than 2,500 whole cancer genomes. *BioRxiv* **237313** (2017).
- 615 15 Ashburner, M. *et al.* Gene ontology: tool for the unification of biology. The Gene Ontology  
616 Consortium. *Nature genetics* **25**, 25-29, doi:10.1038/75556 (2000).
- 617 16 Fabregat, A. *et al.* The Reactome Pathway Knowledgebase. *Nucleic Acids Res* **46**, D649-  
618 D655, doi:10.1093/nar/gkx1132 (2018).
- 619 17 Brown, M. B. A Method for Combining Non-Independent, One-Sided Tests of Significance.  
620 *Biometrics* **31**, 987-992 (1975).
- 621 18 Holm, S. A simple sequentially rejective multiple test procedure. *Scandinavian Journal of*  
622 *Statistics* **6 (2)**, 65–70 (1979).
- 623 19 Merico, D., Isserlin, R., Stueker, O., Emili, A. & Bader, G. D. Enrichment map: a network-  
624 based method for gene-set enrichment visualization and interpretation. *PloS one* **5**,  
625 e13984, doi:10.1371/journal.pone.0013984 (2010).
- 626 20 Reyna, M. A. *et al.* Pathway and network analysis of more than 2,500 whole cancer  
627 genomes. *BioRxiv* **385294**, doi:<https://doi.org/10.1101/385294> (2018).
- 628 21 Leiserson, M. D. *et al.* Pan-cancer network analysis identifies combinations of rare somatic  
629 mutations across pathways and protein complexes. *Nature genetics* **47**, 106-114,  
630 doi:10.1038/ng.3168 (2015).
- 631 22 Reyna, M. A., Leiserson, M. D. M. & Raphael, B. J. Identifying hierarchies of altered  
632 subnetworks. *Bioinformatics* (2018).
- 633 23 Pulido-Tamayo, S., Weytjens, B., De Maeyer, D. & Marchal, K. SSA-ME Detection of  
634 cancer driver genes using mutual exclusivity by small subnetwork analysis. *Sci Rep* **6**,  
635 36257, doi:10.1038/srep36257 (2016).
- 636 24 Verbeke, L. P. *et al.* Pathway Relevance Ranking for Tumor Samples through Network-  
637 Based Data Integration. *PLoS One* **10**, e0133503, doi:10.1371/journal.pone.0133503  
638 (2015).
- 639 25 Sabarinathan, R., Mularoni, L., Deu-Pons, J., Gonzalez-Perez, A. & Lopez-Bigas, N.  
640 Nucleotide excision repair is impaired by binding of transcription factors to DNA. *Nature*  
641 **532**, 264-267, doi:10.1038/nature17661 (2016).
- 642 26 Curtis, C. *et al.* The genomic and transcriptomic architecture of 2,000 breast tumours  
643 reveals novel subgroups. *Nature* **486**, 346-352, doi:10.1038/nature10983 (2012).
- 644 27 Quon, G. *et al.* Computational purification of individual tumor gene expression profiles  
645 leads to significant improvements in prognostic prediction. *Genome Med* **5**, 29,  
646 doi:10.1186/gm433 (2013).
- 647 28 Adams, S. *et al.* Prognostic value of tumor-infiltrating lymphocytes in triple-negative breast  
648 cancers from two phase III randomized adjuvant breast cancer trials: ECOG 2197 and  
649 ECOG 1199. *J Clin Oncol* **32**, 2959-2966, doi:10.1200/JCO.2013.55.0491 (2014).
- 650 29 Sabatier, R. *et al.* A gene expression signature identifies two prognostic subgroups of  
651 basal breast cancer. *Breast Cancer Res Treat* **126**, 407-420, doi:10.1007/s10549-010-  
652 0897-9 (2011).
- 653 30 Carpenter, R. L. & Lo, H. W. Regulation of Apoptosis by HER2 in Breast Cancer. *J*  
654 *Carcinog Mutagen* **2013**, doi:10.4172/2157-2518.S7-003 (2013).

ActivePathways: Paczkowska, Barenboim, *et al.*

- 655 31 Wang, H. Y., Cheng, Z. & Malbon, C. C. Overexpression of mitogen-activated protein  
656 kinase phosphatases MKP1, MKP2 in human breast cancer. *Cancer Lett* **191**, 229-237  
657 (2003).
- 658 32 Denu, R. A. *et al.* Centrosome amplification induces high grade features and is prognostic  
659 of worse outcomes in breast cancer. *BMC Cancer* **16**, 47, doi:10.1186/s12885-016-2083-  
660 x (2016).
- 661 33 Belin, S. *et al.* Dysregulation of ribosome biogenesis and translational capacity is  
662 associated with tumor progression of human breast cancer cells. *PLoS One* **4**, e7147,  
663 doi:10.1371/journal.pone.0007147 (2009).
- 664 34 Guimaraes, J. C. & Zavolan, M. Patterns of ribosomal protein expression specify normal  
665 and malignant human cells. *Genome Biol* **17**, 236, doi:10.1186/s13059-016-1104-z  
666 (2016).
- 667 35 Varelas, X. The Hippo pathway effectors TAZ and YAP in development, homeostasis and  
668 disease. *Development* **141**, 1614-1626, doi:10.1242/dev.102376 (2014).
- 669 36 Yu, F. X., Zhao, B. & Guan, K. L. Hippo Pathway in Organ Size Control, Tissue  
670 Homeostasis, and Cancer. *Cell* **163**, 811-828, doi:10.1016/j.cell.2015.10.044 (2015).
- 671 37 Kolde, R., Laur, S., Adler, P. & Vilo, J. Robust rank aggregation for gene list integration  
672 and meta-analysis. *Bioinformatics* **28**, 573-580, doi:10.1093/bioinformatics/btr709 (2012).
- 673 38 Alexandrov, L. B. *et al.* Signatures of mutational processes in human cancer. *Nature* **500**,  
674 415-421, doi:10.1038/nature12477 (2013).
- 675 39 Lawrence, M. S. *et al.* Mutational heterogeneity in cancer and the search for new cancer-  
676 associated genes. *Nature* **499**, 214-218, doi:10.1038/nature12213 (2013).
- 677 40 Wadi, L., Meyer, M., Weiser, J., Stein, L. D. & Reimand, J. Impact of outdated gene  
678 annotations on pathway enrichment analysis. *Nat Methods* **13**, 705-706,  
679 doi:10.1038/nmeth.3963 (2016).
- 680 41 Liberzon, A. *et al.* Molecular signatures database (MSigDB) 3.0. *Bioinformatics* **27**, 1739-  
681 1740, doi:10.1093/bioinformatics/btr260 (2011).
- 682 42 Vaske, C. J. *et al.* Inference of patient-specific pathway activities from multi-dimensional  
683 cancer genomics data using PARADIGM. *Bioinformatics* **26**, i237-245,  
684 doi:10.1093/bioinformatics/btq182 (2010).
- 685 43 Warde-Farley, D. *et al.* The GeneMANIA prediction server: biological network integration  
686 for gene prioritization and predicting gene function. *Nucleic Acids Res* **38**, W214-220,  
687 doi:10.1093/nar/gkq537 (2010).
- 688 44 Parker, J. S. *et al.* Supervised risk predictor of breast cancer based on intrinsic subtypes.  
689 *J Clin Oncol* **27**, 1160-1167, doi:10.1200/JCO.2008.18.1370 (2009).
- 690 45 Cline, M. S. *et al.* Integration of biological networks and gene expression data using  
691 Cytoscape. *Nature protocols* **2**, 2366-2382, doi:10.1038/nprot.2007.324 (2007).
- 692
